# Supplementary material for: Effects of acute and chronic heat stress on the rumen microbiome in dairy goats
Source: PubMed Central journal article supplement (PMC11541016; doi:10.5713/ab.24.0120), 2024-06-26
Supplement: ab-24-0120-Supplementary-Fig-S1.pdf [file ab-24-0120-Supplementary-Fig-S1.pdf]

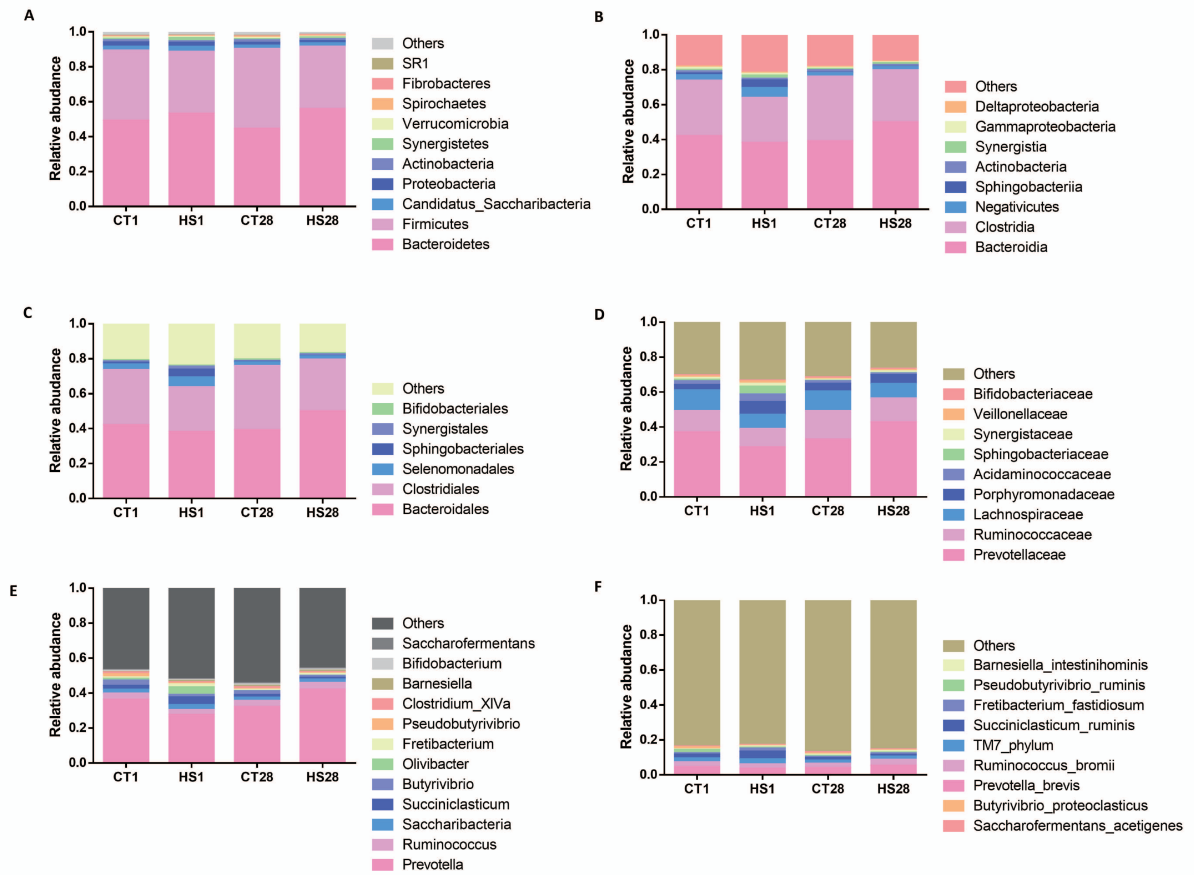

4

5 **Figure S1.** The relative abundance of predominant bacteria after acute and chronic

6 HS in CT1 group, HS1 group, CT28 group, and HS28 group were shown at phylum

7 (A), class (B), order (C), family (D), genus (E), and species (F).
