# Supplementary material for: Effects of acute and chronic heat stress on the rumen microbiome in dairy goats
Source: PubMed Central journal article supplement (PMC11541016; doi:10.5713/ab.24.0120), 2024-06-26
Supplement: ab-24-0120-Supplementary-Table-S1.pdf [file ab-24-0120-Supplementary-Table-S1.pdf]

1 **Table S1.** Differentially expressed genes ( $P < 0.01$ ,  $|\text{Log}_2\text{FC}| > 1.2$ ) in mammary gland  
 2 tissue of dairy goats with acute HS and chronic HS.

| <b>Gene</b>         | <b>Description</b>                                     | <b>Log<sub>2</sub>FC</b> | <b>P value</b> |
|---------------------|--------------------------------------------------------|--------------------------|----------------|
| <b>HS1 VS CT1</b>   |                                                        |                          |                |
| NKX2-4              | NK2 homeobox 4                                         | -4.94                    | 3.51E-05       |
| MAPK4               | Mitogen-activated protein kinase 4                     | -2.54                    | 5.37E-08       |
| CFAP65              | Cilia and flagella associated protein 65               | -2.39                    | 1.80E-04       |
| TPO                 | Thyroid peroxidase                                     | -2.16                    | 1.84E-05       |
| FOSB                | FosB proto-oncogene, AP-1 transcription factor subunit | 2.42                     | 1.71E-05       |
| PRG4                | Proteoglycan 4                                         | 2.81                     | 5.33E-04       |
| FOS                 | Fos proto-oncogene, AP-1 transcription factor subunit  | 2.96                     | 1.55E-06       |
| PPFIA2              | PTPRF interacting protein alpha 2                      | 3.24                     | 1.35E-04       |
| <b>HS28 VS CT28</b> |                                                        |                          |                |
| CHRD2               | Chordin like 2                                         | -1.62                    | 0.001          |
| FGFBP1              | Fibroblast growth factor binding protein 1             | -1.62                    | 1.45E-06       |
| PTGES               | Prostaglandin E synthase                               | -1.56                    | 4.43E-05       |
| MAPK4               | Mitogen-activated protein kinase 4                     | -1.48                    | 2.70E-06       |
| FGR                 | FGR proto-oncogene, Src family tyrosine kinase         | -1.46                    | 2.44E-05       |
| SDSL                | Serine dehydratase like                                | -1.43                    | 4.44E-06       |
| IL6R                | Interleukin 6 receptor                                 | 1.23                     | 1.03E-06       |
| SCN9A               | Sodium voltage-gated channel alpha subunit 9           | 1.36                     | 3.94E-09       |
